# Supplementary material
Source: publisher figshare collection journal article supplement (https://tandf.figshare.com/articles/dataset/_/14043702)

**Supplementary Figure S3.** Summary of incidence rates for the individual cancer endpoints, propensity-score matched cohorts, stratified by time since treatment initiation, all data sources, men

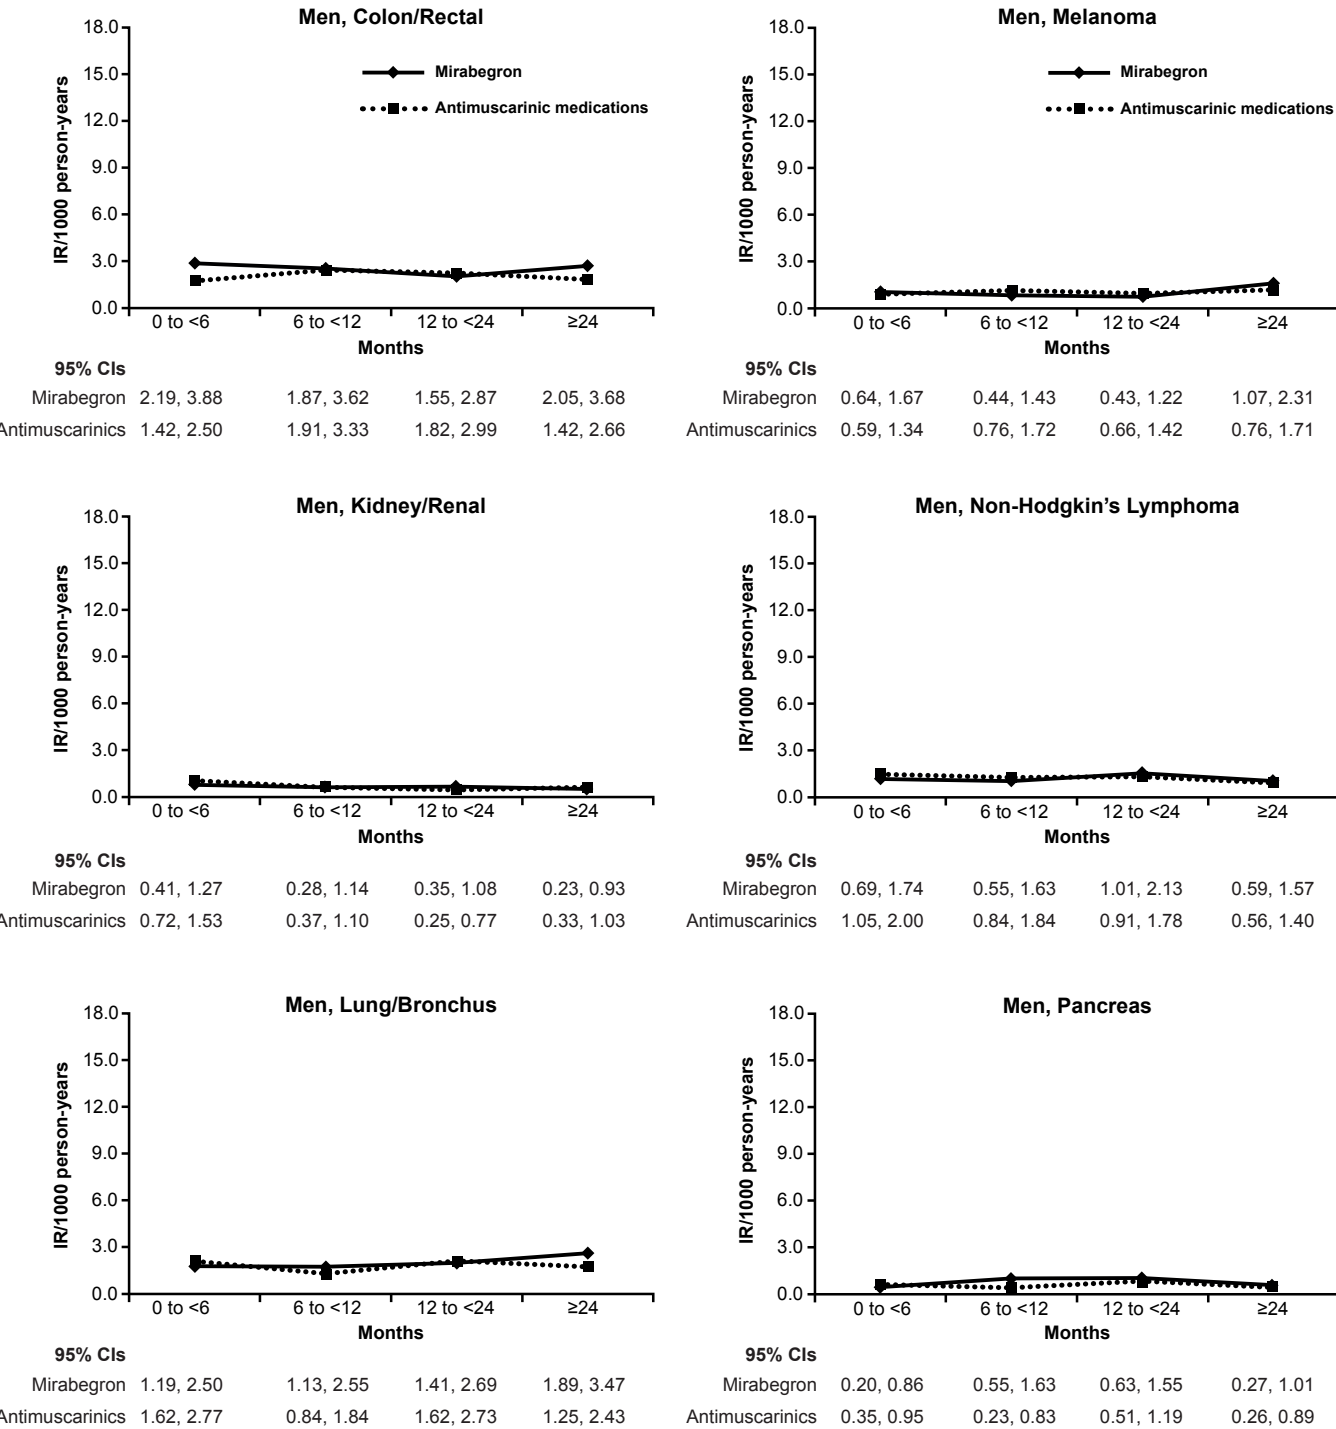

Supplement: Supplementary file 1 [file 1]
