# Supplementary material
Source: publisher figshare collection journal article supplement (https://tandf.figshare.com/articles/dataset/_/14043702)
Supplement: Supplementary file 2 [file 1]

Supplementary Figure S1. Hazard ratios of sex-specific composite cancer endpoints, propensity-score matched cohorts, all ages, by individual data source

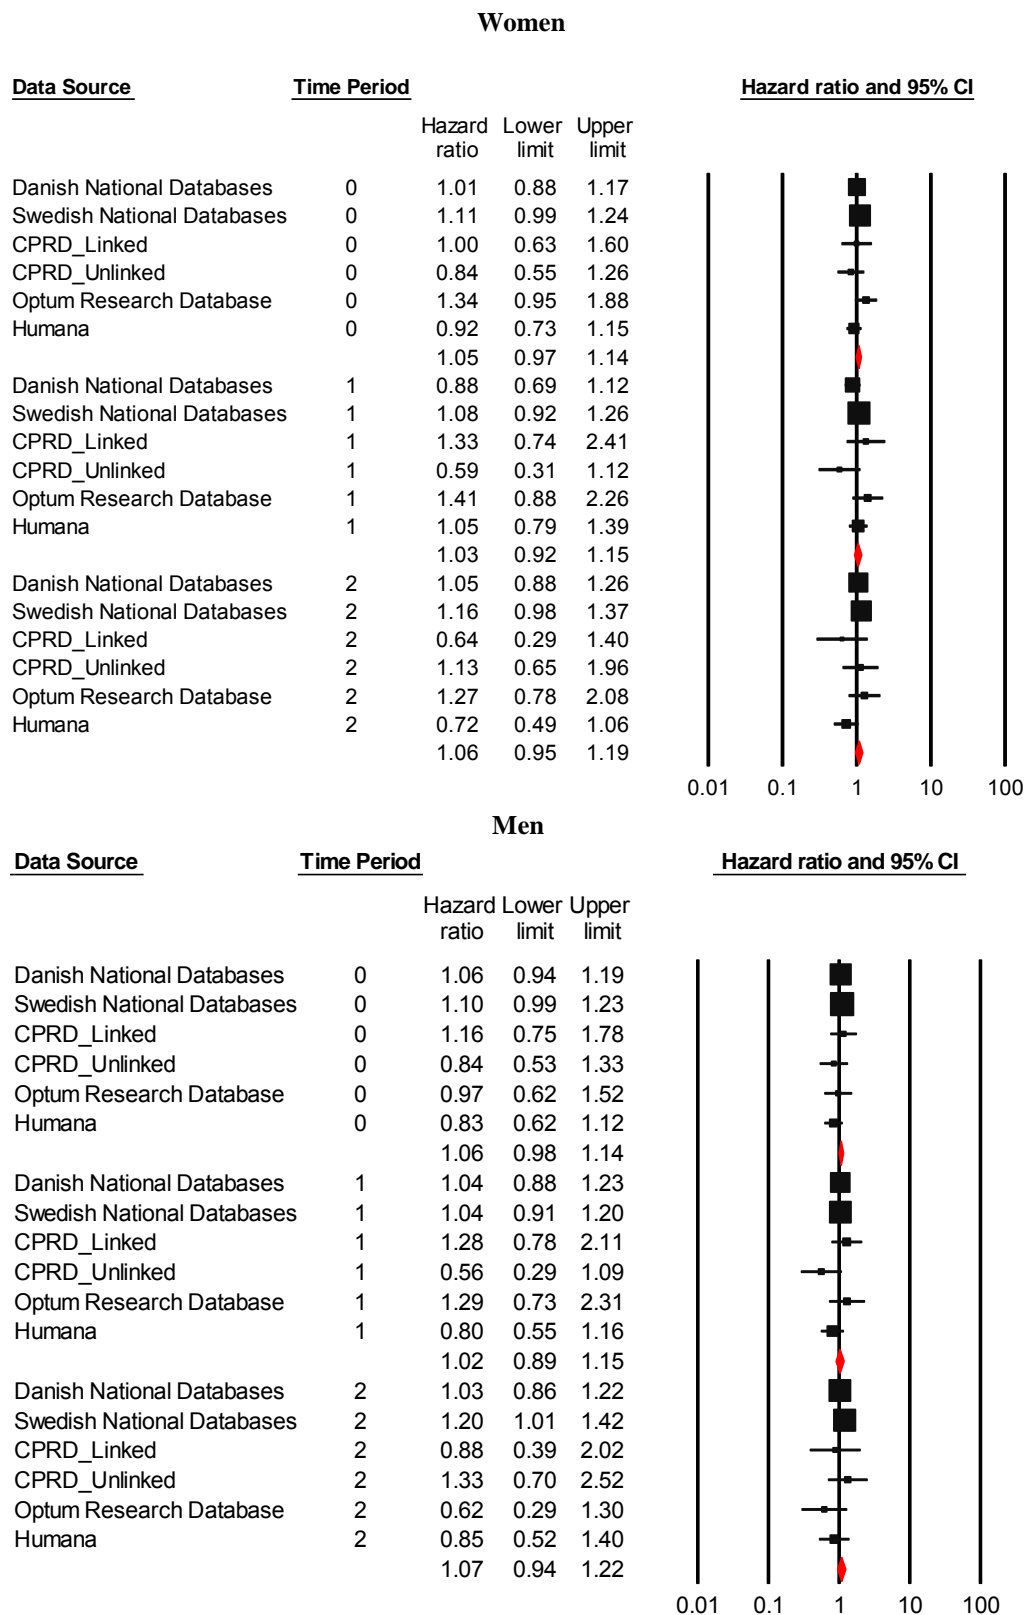

Note: For the time period, 0 = overall; 1 = first year of treatment initiation; 2 = excluding first year of treatment initiation
